# Supplementary material for: Evaluating atmospheric mercury (Hg) uptake by vegetation in a chemistry-transport model
Source: Environ Sci Process Impacts. 2022 Apr 22;24(9):1303–18. doi: 10.1039/d2em00032f (PMC9491292; doi:10.1039/d2em00032f)
Supplement: EM-024-D2EM00032F-s001 [file EM-024-D2EM00032F-s001.xlsx]

## Sheet: data sheet
Location	Region	Latitude (N)	Longitude (E)	Altitude (m)	Study Year	Land Cover	Litterfall Annual Mean Concentration (ng g-1)	Litterfall Annual Mean Flux (µg m-2 yr-1)	Litterfall Annual Standard Deviation (µg m-2 yr-1)	Throughfall Annual Mean Concentration (ng L-1)	Throughfall Annual Mean Flux (µg m-2 yr-1)	Wet Deposition (open field) Annual Mean Concentration (ng L-1)	Wet Deposition (open field) Annual Mean Flux (µg m-2 yr-1)	Dry Deposition Annual Mean Flux (µg m-2 yr-1)	Hg(0) concentration (ng m-3)	Correction Factor from STP to Local Conditions	Total foliar uptake deposition velocity (cm s-1)	Litterfall Dry Deposition velocity (cm s-1)	Micrometeorological deposition velocity (cm s-1)	Flag	Reference Litterfall	Reference Throughfall	Reference Wet Deposition	Reference Hg(0)	Reference dry deposition direct measurement	Reference Previous Compilation	Comment
Mt. Gongga Area, Hailuogou National Forest Park, China	Asia	29.62	102.08	3000	2005-2007	Mixed Forest		35.5		40.2	57.05	14.3	26.1	66.45	3.98	1.39293	0.0736966	0.0393714			Fu et al. 2010a, https://doi.org/10.1016/j.envpol.2010.01.032	Fu et al. 2010a, https://doi.org/10.1016/j.envpol.2010.01.032	Fu et al. 2010a, https://doi.org/10.1016/j.envpol.2010.01.032	Fu et al. 2010a, https://doi.org/10.1016/j.envpol.2010.01.032		Wright et al. 2016, https://doi.org/10.5194/acp-16-13399-2016	Coordinates extracted from Google Maps; throughfall and litterfall are averaged over tree species
Mt. Gongga Area, Hailuogou National Forest Park, China	Asia	29.62	102.08	3000	2017-2019	Broadleaf Forest	37	13.5		10.06	8.6	5.7	9.4	12.7							Wang et al. 2020, https://doi.org/10.1021/acs.est.0c01667	Wang et al. 2020, https://doi.org/10.1021/acs.est.0c01667	Wang et al. 2020, https://doi.org/10.1021/acs.est.0c01667				Fluxes for area of glacier retreat between 1990 - 1958, extracted from Figure 4 and averaged
Mt. Gongga Area, Hailuogou National Forest Park, China	Asia	29.62	102.08	3000	2017-2019	Coniferous Forest	87.5	49		22.95	23.3	5.7	9.4	62.9							Wang et al. 2020, https://doi.org/10.1021/acs.est.0c01667	Wang et al. 2020, https://doi.org/10.1021/acs.est.0c01667	Wang et al. 2020, https://doi.org/10.1021/acs.est.0c01667				Fluxes for area of glacier retreat between 1890 and 1930, extracted from Figure 4 and averaged
Mt. Changbai, China	Asia	42.403	128.112	736	2011-2014	Mixed Forest	47	22.8	9.2			7.4	5.6		1.7	1.12372		0.0477581			Fu et al. 2016, https://doi.org/10.5194/acp-16-11547-2016		Fu et al. 2016, https://doi.org/10.5194/acp-16-11547-2016	Fu et al. 2016, https://doi.org/10.5194/acp-16-11547-2016			Hg(0) concentration extracted from Figure 6b using wet deposition fluxes given in Table 1
Mt. Damei, China	Asia	29.632	121.565	550	2012-2014	Mixed Forest	42.3	23.1	8.7			3.7	6		3.3	1.06367		0.0235945			Fu et al. 2016, https://doi.org/10.5194/acp-16-11547-2016		Fu et al. 2016, https://doi.org/10.5194/acp-16-11547-2016	Fu et al. 2016, https://doi.org/10.5194/acp-16-11547-2016			Hg(0) concentration extracted from Figure 6b using wet deposition fluxes given in Table 1
Mt. Ailao, China	Asia	24.5333	101.017	2450	2011-2014	Broadleaf Forest	58	75	24	22.9	22.9	4.9	4.9	93	2.09	1.28762	0.181564	0.146422			Wang et al. 2016, https://doi.org/10.1002/2016JG003446	Wang et al. 2016, https://doi.org/10.1002/2016JG003446	Wang et al. 2016, https://doi.org/10.1002/2016JG003446	Wang et al. 2016, https://doi.org/10.1002/2016JG003446; Yu et al. 2020, https://doi.org/10.1021/acs.est.9b06715			Litterfall flux of Hg is much higher than Wang et al. 2019 study at the same site
Mt. Ailao, China	Asia	24.5333	101.017	1750	2017	Mixed Forest	44	16.39					7								Wang et al. 2019, https://doi.org/10.1029/2018JG004809		Wang et al. 2019, https://doi.org/10.1029/2018JG004809				Average of leeward and windward slope measurements at different altitudes
Mt. Jinyun, China	Asia	29.6856	106.295		2012-2013	Broadleaf Forest	104.5	43.5		20.1	21.8	11.9	15.9	49.4	3.8	1.1384	0.0468967	0.0412957			Ma et al. 2015, https://doi.org/10.1007/s11356-015-5152-9	Ma et al. 2015, https://doi.org/10.1007/s11356-015-5152-9	Ma et al. 2015, https://doi.org/10.1007/s11356-015-5152-9	Ma et al. 2015, https://doi.org/10.1007/s11356-015-5152-9		Wright et al. 2016, https://doi.org/10.5194/acp-16-13399-2016	Elevation not found
Mt. Jinyun, China	Asia	29.6856	106.295		2013-2014	Mixed Forest		49.8		29.4	28.1	15.6	17.1	60.8	3.8	1.1384	0.0577191	0.0472765			Sun et al. 2019, https://doi.org/10.1016/j.envpol.2019.113065	Sun et al. 2019, https://doi.org/10.1016/j.envpol.2019.113065	Sun et al. 2019, https://doi.org/10.1016/j.envpol.2019.113065	Ma et al. 2015, https://doi.org/10.1007/s11356-015-5152-9
Mt Simian, China	Asia	28.6167	106.392	1394	2012-2013	Broadleaf Forest	106.7	42.89		24.04	32.17	10.94	15.45	59.61	3.8	1.17443	0.0583803	0.0420052			Ma et al. 2016, https://doi.org/10.5194/acp-16-4529-2016	Ma et al. 2016, https://doi.org/10.5194/acp-16-4529-2016	Ma et al. 2016, https://doi.org/10.5194/acp-16-4529-2016	Ma et al. 2015, https://doi.org/10.1007/s11356-015-5152-9		Wright et al. 2016, https://doi.org/10.5194/acp-16-13399-2016
Mt Simian, China	Asia	28.6167	106.392	1394	2013-2015	Broadleaf Forest	105.4	48.33		21.53	23.345	10.19	17.54	54.135	3.8	1.17443	0.0530182	0.047333			Du et al. 2018, https://doi.org/10.3390/ijerph15122618	Du et al. 2018, https://doi.org/10.3390/ijerph15122618	Du et al. 2018, https://doi.org/10.3390/ijerph15122618	Ma et al. 2015, https://doi.org/10.1007/s11356-015-5152-9			Samples are from the next year after Ma et al. 2016 ; average taken over the two sampling years
Mt. Leigong, Guizhou, China	Asia	26.39	108.2	2178	2008-2009	Broadleaf Forest	91	39.5333		8.9	10.5	4	6.1	43.9333	2.8	1.18094	0.0587175	0.0528369			Fu et al. 2010b, https://doi.org/10.5194/acp-10-2425-2010	Fu et al. 2010b, https://doi.org/10.5194/acp-10-2425-2010	Fu et al. 2010b, https://doi.org/10.5194/acp-10-2425-2010	Fu et al. 2010b, https://doi.org/10.5194/acp-10-2425-2010		Wright et al. 2016, https://doi.org/10.5194/acp-16-13399-2016	Litterfall is average of three tree species
LeiGongShan, China	Asia	26.3667	108.183	1680	2005-2006	Mixed Forest		78.3		36.7	41.2	12.9	16.8	102.7							Wang et al. 2009, https://doi.org/10.1016/j.envpol.2008.11.018	Wang et al. 2009, https://doi.org/10.1016/j.envpol.2008.11.018	Wang et al. 2009, https://doi.org/10.1016/j.envpol.2008.11.018			Wright et al. 2016, https://doi.org/10.5194/acp-16-13399-2016
TieShan Ping, China	Asia	29.6333	106.683	450	2009-2011	Coniferous Forest		22.3			67.5										Luo et al. 2015, https://doi.org/10.1016/j.chemosphere.2015.03.081	Luo et al. 2015, https://doi.org/10.1016/j.chemosphere.2015.03.081	Luo et al. 2015, https://doi.org/10.1016/j.chemosphere.2015.03.081			Wright et al. 2016, https://doi.org/10.5194/acp-16-13399-2016
TieShan Ping, China	Asia	29.6333	106.683	475	2005-2006	Coniferous Forest		219.9		69.7	71.3	32.3	29	262.2							Wang et al. 2009, https://doi.org/10.1016/j.envpol.2008.11.018	Wang et al. 2009, https://doi.org/10.1016/j.envpol.2008.11.018	Wang et al. 2009, https://doi.org/10.1016/j.envpol.2008.11.018			Wright et al. 2016, https://doi.org/10.5194/acp-16-13399-2016	Listed longitude incorrect, corrected based on Luo et al. 2015
TieShan Ping, China	Asia	29.6333	106.683	500	2014-2015	Coniferous Forest	85	40.5	9.56						3.51	1.1384		0.0416243			Zhou et al. 2018, https://doi.org/10.1029/2018JG004415			Zhou et al. 2018, https://doi.org/10.1029/2018JG004415			Close to Chongqing, very high TGM concentrations during sampling (3.51 ng/m^3); decrease in litterfall flux from Wang et al. 2009 partly attributed to acid rain damage to forest
TieShan Ping, China	Asia	29.6333	106.683	500	2014-2015	Broadleaf Forest	89	90.9	16.3						3.51	1.1384		0.0934235			Zhou et al. 2018, https://doi.org/10.1029/2018JG004415			Zhou et al. 2018, https://doi.org/10.1029/2018JG004415			Close to Chongqing, very high TGM concentrations during sampling (3.51 ng/m^3)
LuChongGuan, China	Asia	26.6333	106.717	1360	2005-2006	Mixed Forest				43.6	49											Wang et al. 2009, https://doi.org/10.1016/j.envpol.2008.11.018				Wright et al. 2016, https://doi.org/10.5194/acp-16-13399-2016
Yangsuri, Yangpyeong-gun, Gyeonggi-do, South Korea	Asia	37.5333	127.3	60	2008-2010	Deciduous Forest	50.2	4.6			6.4		4.3	6.7	2.15	1.07029	0.0105692	0.00725647			Han et al. 2016, https://doi.org/10.5194/acp-16-7653-2016	Han et al. 2016, https://doi.org/10.5194/acp-16-7653-2016	Han et al. 2016, https://doi.org/10.5194/acp-16-7653-2016	Han et al. 2016, https://doi.org/10.5194/acp-16-7653-2016		Wright et al. 2016, https://doi.org/10.5194/acp-16-13399-2016	Hg(0) concentrated from average GEM seasonal concentrations in Section 3.1
Qianyanzhou, Jiangxi, China	Asia	26.7467	115.07		2013-2014	Coniferous Forest	42.9	21.43			34.57		14.42	41.58	4.15	1.11493	0.035399	0.0182443			Luo et al. 2016, https://doi.org/10.1002/2016JG003388	Luo et al. 2016, https://doi.org/10.1002/2016JG003388	Luo et al. 2016, https://doi.org/10.1002/2016JG003388	Luo et al. 2016, https://doi.org/10.1002/2016JG003388		Zhou et al. 2020, https://doi.org/10.1080/10643389.2019.1661176	Discrepancy from original paper from Zhou et al. (2020) Table 1 for litterfall and throughfall
Huitong, Hunan, China	Asia	26.8333	109.75		2013-2014	Coniferous Forest	177.9	36.4			37.3		15.6	58.1	5.93	1.13392	0.0352053	0.0220563			Yu et al. 2020, https://doi.org/10.1021/acs.est.9b06715	Yu et al. 2020, https://doi.org/10.1021/acs.est.9b06715	Yu et al. 2020, https://doi.org/10.1021/acs.est.9b06715	Yu et al. 2020, https://doi.org/10.1021/acs.est.9b06715		Zhou et al. 2020, https://doi.org/10.1080/10643389.2019.1661176	Discrepancy from original paper from Zhou et al. (2020) Table 1 for litterfall and throughfall; Close to Wanshan Mercury Mine, formerly the largest mercury mine in China
Mt. Dongling, China	Asia	40	115.433	1100	2015	Coniferous Forest	39.8	15.8	3.6						2.5	1.147		0.0229712			Zhou et al. 2017, https://doi.org/10.1002/2017JG003776			Zhou et al. 2017, https://doi.org/10.1002/2017JG003776			Chinese Pine; Sampling occurs 110 km southwest of the center of Beijing
Mt. Dongling, China	Asia	40	115.433	1100	2015	Coniferous Forest	63.3	19.6	3.1						2.5	1.147		0.0284959			Zhou et al. 2017, https://doi.org/10.1002/2017JG003776			Zhou et al. 2017, https://doi.org/10.1002/2017JG003776			Larch; Sampling occurs 110 km southwest of the center of Beijing
Mt. Dongling, China	Asia	40	115.433	1100	2015	Deciduous Forest	46.5	14.1	3.2						2.5	1.147		0.0204996			Zhou et al. 2017, https://doi.org/10.1002/2017JG003776			Zhou et al. 2017, https://doi.org/10.1002/2017JG003776			Oak; Sampling occurs 110 km southwest of the center of Beijing
Mt. Dongling, China	Asia	40	115.433	1100	2015	Deciduous Forest	45.3	12.9	3						2.5	1.147		0.018755			Zhou et al. 2017, https://doi.org/10.1002/2017JG003776			Zhou et al. 2017, https://doi.org/10.1002/2017JG003776			Mixed broadleaf forest; Sampling occurs 110 km southwest of the center of Beijing
Huilong, Guizhou, China	Asia	25.5333	105.517	1500	2018-2019	Coniferous Forest	290	152.83		29.4	21.2709	14.5	19.0748	155.026						contaminated	Xia et al. 2021, https://doi.org/10.1016/j.scitotenv.2020.144892	Xia et al. 2021, https://doi.org/10.1016/j.scitotenv.2020.144892	Xia et al. 2021, https://doi.org/10.1016/j.scitotenv.2020.144892				Close to Hg mining region; fluxes in paper are normalized by area in catchment, used instead fluxes in Table 1 to calculate fluxes for forested area; Hg0 concentration listed in SI as 32.2 ng/m^3, but only measured in December
Chenqi, Guizhou, China	Asia	26.25	105.767	1400	2018-2019	Mixed Forest	65	31.395		23	17.8434	11.1	13.249	35.9894	2.6	1.27648	0.0559914	0.0488435			Xia et al. 2021, https://doi.org/10.1016/j.scitotenv.2020.144892	Xia et al. 2021, https://doi.org/10.1016/j.scitotenv.2020.144892	Xia et al. 2021, https://doi.org/10.1016/j.scitotenv.2020.144892	Xia et al. 2021, https://doi.org/10.1016/j.scitotenv.2020.144892			Regional background site; fluxes in paper are normalized by area in catchment, used instead fluxes in Table 1 to calculate fluxes for forested area; Hg0 concentration is average of range, 2.13 - 3.05 ng m^-3
Zhanjiang and Daguansha, China	Asia	21.1	110.3		2008	Mangrove Swamp	741.5	260.925												urban	Ding et al. https://doi.org/10.1016/j.apgeochem.2010.11.020						Extremely high atmospheric Hg concentrations (72.5 ng/m3), but only measured once so not reliable as average
Negro River Basin, Brazil	South America	-1.3	-62.3		2003	Tropical Rainforest	48	43	15				22.9		1.04	1.10691		0.145028			Da Silva et al. 2009, https://doi.org/10.1590/S0103-50532009000600019		Da Silva et al. 2009, https://doi.org/10.1590/S0103-50532009000600019	GMOS Manaus average		Fostier et al. 2015, https://doi.org/10.1016/j.envpol.2015.08.010	Coordinates extracted from Google Maps; Listed year is for literfall
French Guiana	South America	4.18	-52.49		1992-1995	Tropical Rainforest	119	96.985							1.04	1.10691		0.327105			Roulet et al. 1999, https://doi.org/10.1023/A:1005073432015			GMOS Manaus average		Fostier et al. 2015, https://doi.org/10.1016/j.envpol.2015.08.010	Using listed weighted mean litterfall flux estimate of 8.15 Mg/ha/yr
Tocantins, Brazil	South America	-4.21	-50.3		1992-1995	Tropical Rainforest	114	92.91							1.04	1.10691		0.313361			Roulet et al. 1999, https://doi.org/10.1023/A:1005073432015			GMOS Manaus average		Fostier et al. 2015, https://doi.org/10.1016/j.envpol.2015.08.010	Using listed weighted mean litterfall flux estimate of 8.15 Mg/ha/yr
Toapajos Basin, Brazil	South America	-3.12	-54.63		1992-1995	Tropical Rainforest	82	66.83							1.04	1.10691		0.2254			Roulet et al. 1999, https://doi.org/10.1023/A:1005073432015			GMOS Manaus average		Fostier et al. 2015, https://doi.org/10.1016/j.envpol.2015.08.010	Using listed weighted mean litterfall flux estimate of 8.15 Mg/ha/yr
Alta Floresta, Brazil	South America	-9.87	-56.1		2004	Tropical Rainforest	60	48.9							1.04	1.10691		0.164927			Michelazzo et al., 2010, https://doi.org/10.1029/2009GL042220			GMOS Manaus average		Fostier et al. 2015, https://doi.org/10.1016/j.envpol.2015.08.010	Using listed weighted mean litterfall flux estimate of 8.15 Mg/ha/yr
Alta Floresta, Brazil	South America	-9.87	-56.1		2005	Tropical Rainforest	111	90.465							1.04	1.10691		0.305115			Michelazzo et al., 2010, https://doi.org/10.1029/2009GL042220			GMOS Manaus average		Fostier et al. 2015, https://doi.org/10.1016/j.envpol.2015.08.010	Using listed weighted mean litterfall flux estimate of 8.15 Mg/ha/yr
Rio Branco, Brazil	South America	-10.0286	-67.68		2011	Ombrophilous Open Forest	40	32.6							1.04	1.10691		0.109951			Melendez-Perez, J. J., et al. 2014, https://doi.org/10.1016/j.atmosenv.2014.06.032			GMOS Manaus average		Fostier et al. 2015, https://doi.org/10.1016/j.envpol.2015.08.010	Using listed weighted mean litterfall flux estimate of 8.15 Mg/ha/yr
Alta Floresta, Brazil	South America	-9.95	-56.33		2013	Tropical Rainforest	55	44.825							1.04	1.10691		0.151183			Fostier et al. 2015, https://doi.org/10.1016/j.envpol.2015.08.010					Fostier et al. 2015, https://doi.org/10.1016/j.envpol.2015.08.010	Using listed weighted mean litterfall flux estimate of 8.15 Mg/ha/yr
Candeias de Jamari, Brazil	South America	-8.73	-63.47		2013	Tropical Rainforest	61	49.715							1.04	1.10691		0.167676			Fostier et al. 2015, https://doi.org/10.1016/j.envpol.2015.08.010					Fostier et al. 2015, https://doi.org/10.1016/j.envpol.2015.08.010	Using listed weighted mean litterfall flux estimate of 8.15 Mg/ha/yr
Candeias de Jamari, Brazil	South America	-8.63	-63.35		2014	Tropical Rainforest	57	46.455							1.04	1.10691		0.156681			Fostier et al. 2015, https://doi.org/10.1016/j.envpol.2015.08.010					Fostier et al. 2015, https://doi.org/10.1016/j.envpol.2015.08.010	Using listed weighted mean litterfall flux estimate of 8.15 Mg/ha/yr
French Guiana	South America	3.90618	-52.8609		1999-2001	Tropical Rainforest	64	45	10												Mélières et al. 2003, https://doi.org/10.1016/S0048-9697(03)00142-6					Wright et al. 2016, https://doi.org/10.5194/acp-16-13399-2016	Average of foliar concentrations in two sites from French Guiana
Tapajós valley, Pará, Brazil	South America	-3.7	-55.5			Tropical Rainforest	73	52												see comment	Roulet et al. 1998, https://doi.org/10.1016/S0048-9697(98)00265-4					Wright et al. 2016, https://doi.org/10.5194/acp-16-13399-2016	Coordinates extracted from Google Maps; not clear if the provided numbers represent an annual litterfall flux. Concentration is average of all sites in Table 1 for Litter- Leaves. Flux is average of all sites for Litter - Total.
Ilha Grande, Brazil	South America	-23.14	-44.18	280	1997	Tropical Rainforest	131	122												urban influenced	Silva-Filho et al. 2006, https://doi.org/10.1016/j.chemosphere.2006.04.053					Wright et al. 2016, https://doi.org/10.5194/acp-16-13399-2016	Coordinates extracted from Google Maps; somewhat urban influenced, but off the coast on a separate island
Serra de Mantiqueira, Brazil	South America	-22.31	-44.59	1400	2009-2011	Tropical Rainforest	58	34.6	1.2												Teixeira et al. 2017, https://doi.org/10.1016/j.chemosphere.2016.10.081					Wright et al. 2016, https://doi.org/10.5194/acp-16-13399-2016	Coordinates extracted from Google Maps;
Reserva Ducke, Manaus, Brazil	South America	-2.5	-60		2005-2006	Tropical Rainforest				41	23.6	24	24.4									Peleja, PhD Thesis, 2007, https://bdtd.inpa.gov.br/handle/tede/1496	Peleja, PhD Thesis, 2007, https://bdtd.inpa.gov.br/handle/tede/1496			Martin Jiskra compilation	open wet deposition is greater than throughfall flux? Uptake by vegetation?
Reserva da Campina, Manaus, Brazil	South America	-2.93333	-60.9667		2005-2006	Tropical Rainforest				14	13.7	15	21.7									Peleja, PhD Thesis, 2007, https://bdtd.inpa.gov.br/handle/tede/1496	Peleja, PhD Thesis, 2007, https://bdtd.inpa.gov.br/handle/tede/1496			Martin Jiskra compilation	open wet deposition is greater than throughfall flux? Uptake by vegetation?
Serra do Navio, Amapá State, Brazil	South America	0.918056	-51.9838		1996-1997	Tropical Rainforest				47.9	72	9.2	18.2									Fostier et al., 2000, https://doi.org/10.1016/S0048-9697(00)00564-7	Fostier et al., 2000, https://doi.org/10.1016/S0048-9697(00)00564-7			Wright et al. 2016, https://doi.org/10.5194/acp-16-13399-2016	Coordinates extracted from Google Maps; Throughfall is extrapolated from five months of data (March–August 1997)
São Francisco do Itabapoana, Brazil	South America	-21.6	-41.05		2006	Mangrove Forest	31	24													Fragoso et al. 2018, https://doi.org/10.1016/j.ecss.2017.12.005						Average of three tree species
Cunha, Brazil	South America	-23.2456	-45.0481	1050	2001	Rural forest	72	60	36												Fostier et al. 2003, https://doi.org/10.1051/jp4:20020348					Wright et al. 2016, https://doi.org/10.5194/acp-16-13399-2016	analysis of Hg occurred for litter during dry period; numbers differ from paper
Gårdsjön, Sweden	Europe	58.0667	12.05	127	1987-1989	Coniferous Forest	125	25		48.4	17.5	13	12	30.5							Iverfeldt, 1991, https://doi.org/10.1007/BF00342299	Iverfeldt, 1991, https://doi.org/10.1007/BF00342299	Iverfeldt, 1991, https://doi.org/10.1007/BF00342299			Wright et al. 2016, https://doi.org/10.5194/acp-16-13399-2016	Average concentration in throughfall listed in Table 3 (48.4 ng/L) differs from value in abstract (13 ng/L); Throughfall flux values of 16 and 19 µg m^-2 yr^-1 at two plots.
Gårdsjön, Sweden	Europe	58.0667	12.05	127	1991-1994	Coniferous Forest		10.4		22.8	16.0667	11.9	11.2	15.2667							Munthe et al. 1995, https://doi.org/10.1007/978-94-011-0153-0_40	Munthe et al. 1995, https://doi.org/10.1007/978-94-011-0153-0_40	Munthe et al. 1995, https://doi.org/10.1007/978-94-011-0153-0_40			Wright et al. 2016, https://doi.org/10.5194/acp-16-13399-2016	Coordinates taken from Iverfeldt, 1999
Gårdsjön, Sweden	Europe	58.0667	12.05	127	1995-1997	Coniferous Forest		23													Munthe et al. 1998	Munthe et al. 1998	Munthe et al. 1998			Wright et al. 2016, https://doi.org/10.5194/acp-16-13399-2016	Book not found online; values taken from Wright et al. 2016 compilation;
Gårdsjön, Sweden	Europe	58.0667	12.05	127	1991-1994	Coniferous Forest		23			16.0333		11.2	27.8333							Munthe et al. 1998	Hultberg et al. 1995, https://doi.org/10.1007/BF01189691	Hultberg et al. 1995, https://doi.org/10.1007/BF01189691			Wright et al. 2016, https://doi.org/10.5194/acp-16-13399-2016	Overlapping dataset with Munthe et al. 1995, but involves different sampling site
Gårdsjön, Sweden	Europe	58.0667	12.05	127	1996-2011	Coniferous Forest		38			17				1.6	1.04363		0.0785441			Bringmark et al. 2013, https://doi.org/10.1007/s11270-013-1502-8	Bringmark et al. 2013, https://doi.org/10.1007/s11270-013-1502-8		Average of SE0002R (Rorvik), SE0014R (Rao), NO0001R (Birkenes), SE00020R (Hallahus), Vavihill EMEP sites			Extracted from Figure 6
Langtjern, Buskerud, Norway	Europe	60.14	10.39	500	2004-2005	Coniferous forest	36.9667	2.7			6.7										Larssen et al. 2008, https://doi.org/10.1016/j.scitotenv.2008.03.013	Larssen et al. 2008, https://doi.org/10.1016/j.scitotenv.2008.03.013				Wright et al. 2016, https://doi.org/10.5194/acp-16-13399-2016	Coordinates extracted from Google Maps; no measurement of open wet deposition available
Svartberget, Sweden	Europe	64.2333	19.7667		1994-1997	Coniferous forest		17			15		7	25							Lee et al. 2000, https://doi.org/10.1016/s0048-9697(00)00538-6	Lee et al. 2000, https://doi.org/10.1016/s0048-9697(00)00538-6	Lee et al. 2000, https://doi.org/10.1016/s0048-9697(00)00538-6			Wright et al. 2016, https://doi.org/10.5194/acp-16-13399-2016
Svartberget, Sweden	Europe	64.2448	19.7653		2018	Coniferous Forest		5.8							1.288	1.03167		0.0147217			Wohlgemuth et al. 2020, https://doi.org/10.5194/bg-17-6441-2020			SE0005R (Bredkalen) from EMEP			Foliar uptake fluxes calculated - comparable to litterfall estimates but at the lower end; Extracted from Figure 9b
Steinkreuz, Germany	Europe	49.8731	10.4636	500	1998-1999	Deciduous Forest	59	34		28	28.7	19	27.5	35.2	1.33	1.07992	0.0905708	0.0874832			Schwesig and Matzner, 2000, https://doi.org/10.1016/s0048-9697(00)00565-9	Schwesig and Matzner, 2000, https://doi.org/10.1016/s0048-9697(00)00565-9	Schwesig and Matzner, 2000, https://doi.org/10.1016/s0048-9697(00)00565-9	SE0002R (Rorvik) from EMEP		Wright et al. 2016, https://doi.org/10.5194/acp-16-13399-2016	Open wet deposition is bulk deposition measurement; fluxes extracted from Figure 2 of Schwesig and Matzner, 2000
Lehstenbach, Germany	Europe	50.1431	11.8694	790	1998-1999	Coniferous forest	68	15.7		29	38.4	18	34.9	19.2	1.33	1.09389	0.0500413	0.0409192			Schwesig and Matzner, 2000, https://doi.org/10.1016/s0048-9697(00)00565-9	Schwesig and Matzner, 2000, https://doi.org/10.1016/s0048-9697(00)00565-9	Schwesig and Matzner, 2000, https://doi.org/10.1016/s0048-9697(00)00565-9	SE0002R (Rorvik) from EMEP		Wright et al. 2016, https://doi.org/10.5194/acp-16-13399-2016	Open wet deposition is bulk deposition measurement; fluxes extracted from Figure 2 of Schwesig and Matzner, 2000
Lehstenbach, Germany	Europe	50.1431	11.8694	790	1998-1999	Coniferous forest	70	15.1		27	40.1				1.33	1.09389		0.0393554			Schwesig and Matzner, 2001, https://doi.org/10.1023/A:1010600600099	Schwesig and Matzner, 2001, https://doi.org/10.1023/A:1010600600099		SE0002R (Rorvik) from EMEP		Wright et al. 2016, https://doi.org/10.5194/acp-16-13399-2016	Overlapping dataset with Schwesig and Matzner (2000): Schwesig and Matzner (2001) study is from September 1998- September 1999, Schwesig and Matzner (2000) is from April 1998 to April 1999
Uraani, Finland	Europe	61	24.75	130	1994-1995	Coniferous forest		37.23			15.81		5.1	47.94							Porvari and Verta 2003, https://doi.org/10.1016/S0269-7491(02)00404-9	Porvari and Verta 2003, https://doi.org/10.1016/S0269-7491(02)00404-9	Porvari and Verta 2003, https://doi.org/10.1016/S0269-7491(02)00404-9			Wright et al. 2016, https://doi.org/10.5194/acp-16-13399-2016	Open wet deposition is bulk deposition measurement; throughfall and litterfall are cited as 3.1 and 7.3 times bulk deposition, from unpublished data.
Aneboda, Sweden	Europe	57.12	14.55		1996-2011	Coniferous Forest	72.2	19		15.9	8.5	6.6	5.4516	22.0484	1.6	1.04706	0.0457227	0.0394011			Veiteberg Braaten et al. 2018: Atmospheric deposition and lateral transport of mercury in Norwegian drainage basins: A mercury budget for Norway report (NIVA 7310-2018); Bringmark et al. 2013, https://doi.org/10.1007/s11270-013-1502-8	Veiteberg Braaten et al. 2018: Atmospheric deposition and lateral transport of mercury in Norwegian drainage basins: A mercury budget for Norway report (NIVA 7310-2018); Bringmark et al. 2013, https://doi.org/10.1007/s11270-013-1502-8	Veiteberg Braaten et al. 2018: Atmospheric deposition and lateral transport of mercury in Norwegian drainage basins: A mercury budget for Norway report (NIVA 7310-2018)	average of SE0002R (Rorvik), SE0014R (Rao), NO0001R (Birkenes), SE00020R (Hallahus), Vavihill from EMEP			Coordinates extracted from Google Maps; Where available, used numbers from report instead of extracting from Figure in Bringmark et al. 2013. Calculated wet deposition flux by multiplying by mean precipitation flux at site from Table 1 in report
Kindla, Sweden	Europe	59.77	14.89		1996-2011	Coniferous Forest	50.2	9.9		16.6	10.1	4.7	4.2958	15.7042	1.6	1.04669	0.0325549	0.0205228			Veiteberg Braaten et al. 2018: Atmospheric deposition and lateral transport of mercury in Norwegian drainage basins: A mercury budget for Norway report (NIVA 7310-2018); Bringmark et al. 2013, https://doi.org/10.1007/s11270-013-1502-8	Veiteberg Braaten et al. 2018: Atmospheric deposition and lateral transport of mercury in Norwegian drainage basins: A mercury budget for Norway report (NIVA 7310-2018); Bringmark et al. 2013, https://doi.org/10.1007/s11270-013-1502-8	Veiteberg Braaten et al. 2018: Atmospheric deposition and lateral transport of mercury in Norwegian drainage basins: A mercury budget for Norway report (NIVA 7310-2018)	average of SE0002R (Rorvik), SE0014R (Rao), NO0001R (Birkenes), SE00020R (Hallahus), Vavihill from EMEP			Coordinates extracted from Google Maps; Where available, used numbers from report instead of extracting from Figure in Bringmark et al. 2013. Calculated wet deposition flux by multiplying by mean precipitation flux at site from Table 1 in report
Gammtratten, Sweden	Europe	63.87	18.13		1996-2011	Coniferous Forest	56.1	6.8			4.5	2.2	1.408	9.892	1.71	1.05078	0.0192621	0.0132412			Veiteberg Braaten et al. 2018: Atmospheric deposition and lateral transport of mercury in Norwegian drainage basins: A mercury budget for Norway report (NIVA 7310-2018); Bringmark et al. 2013, https://doi.org/10.1007/s11270-013-1502-8	Bringmark et al. 2013, https://doi.org/10.1007/s11270-013-1502-8	Veiteberg Braaten et al. 2018: Atmospheric deposition and lateral transport of mercury in Norwegian drainage basins: A mercury budget for Norway report (NIVA 7310-2018)	Bredkalen from EMEP			Coordinates extracted from Google Maps; Where available, used numbers from report instead of extracting from Figure in Bringmark et al. 2013. Extracted throughfall from Figure 6 of Bringmark et al., 2013. Total precipitation flux taken from ICP-IM online dataset: https://deims.org/dataset/8c60ec68-b110-4768-bdcb-fb42fd40521d
O Carballiño, Galicia, Spain	Europe	42.421	-8.08272	377	2015-2016	Deciduous Forest	39.3	23.6							1.45	1.12417		0.0579805			Gómez Armesto et al. 2020, https://doi.org/10.1016/j.jenvman.2020.110858			Value for Longobucco from GMOS
Lesní potok, Czechia	Europe	49.9667	14.8167	455.5	2006-2019	Deciduous Forest	52	12.9		8.1	3.9	5	2.9	13.9	1.6	1.08593	0.0298952	0.0277445			Navrátil et al. 2021, https://doi.org/10.1002/hyp.14255	Navrátil et al. 2021, https://doi.org/10.1002/hyp.14255	Navrátil et al. 2021, https://doi.org/10.1002/hyp.14255	Navrátil et al. 2021, https://doi.org/10.1002/hyp.14255			Coordinates extracted from Google Maps;
Lesní potok, Czechia	Europe	49.9667	14.8167	455.5	2006-2019	Coniferous Forest	63	20.7		10.9	7.6	5	2.9	25.4	1.6	1.08593	0.0546286	0.0445202			Navrátil et al. 2021, https://doi.org/10.1002/hyp.14255	Navrátil et al. 2021, https://doi.org/10.1002/hyp.14255	Navrátil et al. 2021, https://doi.org/10.1002/hyp.14255	Navrátil et al. 2021, https://doi.org/10.1002/hyp.14255			Coordinates extracted from Google Maps;
Kremnické vrchy Mts., Slovakia (MP1)	Europe	48.7164	19.0475	730	2018	Mixed Forest	170	26.98		150	73.9	90	51.3	49.58						contaminated	Mačejná et al. 2021, https://doi.org/10.2478/johh-2021-0005	Mačejná et al. 2021, https://doi.org/10.2478/johh-2021-0005	Mačejná et al. 2021, https://doi.org/10.2478/johh-2021-0005				Year missing, taken as year of median year of grants listed;
Kremnické vrchy Mts., Slovakia (MP2)	Europe	48.6931	19.0594	740	2018	Mixed Forest	80	22.94		160	50.7	70	37.2	36.44	1.64	1.07439	0.0756485	0.0476228			Mačejná et al. 2021, https://doi.org/10.2478/johh-2021-0005	Mačejná et al. 2021, https://doi.org/10.2478/johh-2021-0005	Mačejná et al. 2021, https://doi.org/10.2478/johh-2021-0005	CZ0003R (Kosetice) for 2015 from EMEP			Year missing, taken as year of median year of grants listed;
Načetín, Czechia	Europe	50.5906	13.2539	784	1994-2012	Coniferous Forest	63.1	14.5													Navrátil et al. 2016, http://doi.org/10.1016/j.apgeochem.2016.10.005						Archived litterfall samples
Načetín, Czechia	Europe	50.5894	13.2686	823	2004	Deciduous Forest	36.3	22.5													Navrátil et al. 2016, http://doi.org/10.1016/j.apgeochem.2016.10.005						Archived litterfall samples
Plešné Lake, Czechia	Europe	48.777	13.867	1089	2003-2017	Coniferous Forest		43				2.5	2.65								Navrátil et al. 2019, https://doi.org/10.1016/j.scitotenv.2019.05.093		Navrátil et al. 2019, https://doi.org/10.1016/j.scitotenv.2019.05.093				Only control plot (PL-live), not plots where tree dieback occurred; decreasing trend of Hg in litterfall over time
Čertovo Lake, Czechia	Europe	49.165	13.198	1028	2003-2015	Coniferous Forest		32													Navrátil et al. 2019, https://doi.org/10.1016/j.scitotenv.2019.05.093						decreasing trend of Hg in litterfall over time
Hässleholm, Sweden	Europe	56.16	13.76	130	2003	Deciduous Forest	65	20.8													Tyler 2005, https://doi.org/10.1016/j.foreco.2004.10.065						Calculate litterfall using 3.2 t/ha/yr estimated leaf litter production (3.0-3.4 t/ha/yr) from this site reported by Tyler and Olsson 2006, https://doi.org/10.1016/j.chemosphere.2006.02.051
Norunda, Sweden	Europe	60.0833	17.4833		2018	Coniferous Forest		9.7													Wohlgemuth et al. 2020, https://doi.org/10.5194/bg-17-6441-2020						Foliar uptake fluxes calculated - comparable to litterfall estimates but at the lower end; Extracted from Figure 9b
Hyltemossa, Sweden	Europe	56.0978	13.4194		2018	Coniferous Forest		14													Wohlgemuth et al. 2020, https://doi.org/10.5194/bg-17-6441-2020						Foliar uptake fluxes calculated - comparable to litterfall estimates but at the lower end; Extracted from Figure 9b
Hölstein, Switzerland	Europe	47.4386	7.77583		2018	Mixed Forest		14.1							1.65	1.09582		0.0296742			Wohlgemuth et al. 2020, https://doi.org/10.5194/bg-17-6441-2020			Wohlgemuth et al. 2020, https://doi.org/10.5194/bg-17-6441-2020			Foliar uptake fluxes calculated - comparable to litterfall estimates but at the lower end; Extracted from Figure 9b
Whiteface Mountain, NY, USA	North America	44.37	-73.9	650	2009-2011	Deciduous Forest		6.3			7.15	5.58033	7.5175	5.9325	1.374	1.06008	0.0145042	0.0154027			Blackwell and Driscoll, 2015b, https://doi.org/10.1021/es505928w	Blackwell and Driscoll, 2015b, https://doi.org/10.1021/es505928w	Mercury Deposition Network	average of Huntington Forest (HTW) and Underhill (UDH) from AMNET		Wright et al. 2016, https://doi.org/10.5194/acp-16-13399-2016	Hardwood measurements; Wet deposition can be estimated from Underhill, VT and Huntington Forest, NY sites, but in Wright et al. 2016 it was estimated from cloudwater;
Whiteface Mountain, NY, USA	North America	44.37	-73.9	1150	2009-2011	Coniferous Forest		9.15			13.1	5.58033	7.5175	14.7325	1.374	1.06008	0.0360191	0.0223706			Blackwell and Driscoll, 2015b, https://doi.org/10.1021/es505928w	Blackwell and Driscoll, 2015b, https://doi.org/10.1021/es505928w	Mercury Deposition Network	average of Huntington Forest (HTW) and Underhill (UDH) from AMNET		Wright et al. 2016, https://doi.org/10.5194/acp-16-13399-2016	Spruce/Fir measurements; Wet deposition can be estimated from Underhill, VT and Huntington Forest, NY sites, but in Wright et al. 2016 it was estimated from cloudwater; High cloudwater fluxes relevant at this site
Whiteface Mountain, NY, USA	North America	44.37	-73.9	1415	2009-2011	Coniferous Forest		4			8.05	5.58033	7.5175	4.5325						alpine	Blackwell and Driscoll, 2015b, https://doi.org/10.1021/es505928w	Blackwell and Driscoll, 2015b, https://doi.org/10.1021/es505928w	Mercury Deposition Network			Wright et al. 2016, https://doi.org/10.5194/acp-16-13399-2016	Alpine measurements; Wet deposition can be estimated from Underhill, VT and Huntington Forest, NY sites, but in Wright et al. 2016 it was estimated from cloudwater; High cloudwater fluxes relevant at this site
Whiteface Mountain, NY, USA	North America	44.37	-73.9	650	2015	Deciduous Forest		7.8	0.5		4.5		4.2	8.1	1.267	1.06008	0.0214759	0.0206805			Gerson et al. 2017, https://doi.org/10.1002/2016JG003721	Gerson et al. 2017, https://doi.org/10.1002/2016JG003721	Gerson et al. 2017, https://doi.org/10.1002/2016JG003721	average of Huntington Forest (HTW) and Underhill (UDH) from AMNET			Hardwood measurements;
Whiteface Mountain, NY, USA	North America	44.37	-73.9	1150	2015	Coniferous Forest		7.7	1		11		4.4	14.3	1.267	1.06008	0.0379143	0.0204154			Gerson et al. 2017, https://doi.org/10.1002/2016JG003721	Gerson et al. 2017, https://doi.org/10.1002/2016JG003721	Gerson et al. 2017, https://doi.org/10.1002/2016JG003721	average of Huntington Forest (HTW) and Underhill (UDH) from AMNET			Spruce/Fir measurements; High cloudwater fluxes relevant at this site
Whiteface Mountain, NY, USA	North America	44.37	-73.9	1415	2015	Coniferous Forest		5.5	1.1		10		13	2.5						alpine	Gerson et al. 2017, https://doi.org/10.1002/2016JG003721	Gerson et al. 2017, https://doi.org/10.1002/2016JG003721	Gerson et al. 2017, https://doi.org/10.1002/2016JG003721				Alpine measurements; High cloudwater fluxes relevant at this site
Huntington Forest, NY, USA	North America	43.97	-74.22	530	2004-2005	Deciduous Forest		17.15		6.6	6.1	4.9	5.8	17.45	1.4	1.06008	0.0418708	0.0411509			Bushey et al., 2008, https://doi.org/10.1016/j.atmosenv.2008.05.043	Choi et al., 2008, https://doi.org/10.1016/j.atmosenv.2007.11.036	Choi et al., 2008, https://doi.org/10.1016/j.atmosenv.2007.11.036	Bushey et al., 2008, https://doi.org/10.1016/j.atmosenv.2008.05.043		Wright et al. 2016, https://doi.org/10.5194/acp-16-13399-2016
Huntington Forest, NY, USA	North America	43.97	-74.22		2004-2006	Deciduous Forest	46.5	5.97			7.31		6.97	6.31	1.4	1.06008	0.0151407	0.0143248			Selvendiran et al. 2008, https://doi.org/10.1029/2008JG000739	Choi et al., 2008, https://doi.org/10.1016/j.atmosenv.2007.11.036	MDN			Wright et al. 2016, https://doi.org/10.5194/acp-16-13399-2016	Throughfall estimated from Choi et al., 2008, https://doi.org/10.1016/j.atmosenv.2007.11.036 concentrations
Huntington Forest, NY, USA	North America	43.97	-74.22	500	2009-2011	Coniferous Forest	29.2333	8.7			18.2		6.7	20.2	1.288	1.06008	0.052684	0.0226907			Blackwell et al. 2014, https://doi.org/10.1007/s10533-014-9961-6		Blackwell et al. 2014, https://doi.org/10.1007/s10533-014-9961-6	Huntington Forest data from AMNET
Huntington Forest, NY, USA	North America	43.97	-74.22	500	2009-2011	Deciduous Forest	33.5333	8.9			6.9		6.7	9.1	1.288	1.06008	0.0237339	0.0232123			Blackwell et al. 2014, https://doi.org/10.1007/s10533-014-9961-6		Blackwell et al. 2014, https://doi.org/10.1007/s10533-014-9961-6	Huntington Forest data from AMNET
Huntington Wildlife, NY, USA (NY20)	North America	43.97	-74.22	500	2012-2014	Deciduous Forest	45.1	11.25					6		1.276	1.06008		0.0296173			Risch et al. 2017, https://doi.org/10.1016/j.envpol.2017.05.004		Risch et al. 2017, https://doi.org/10.1016/j.envpol.2017.05.004	Huntington Forest data from AMNET
Sunday Lake, NY, USA	North America	43.8611	-75.1019		2001-2003	Deciduous Forest	87.85	14.9	0.5		7.4	6.73167	7.34233	14.9577							Demers et al. 2007, https://doi.org/10.1890/06-1697.1	Demers et al. 2007, https://doi.org/10.1890/06-1697.1; Kalicin et al., 2008	Mercury Deposition Network			Wright et al. 2016, https://doi.org/10.5194/acp-16-13399-2016	Longitude corrected by 1 degree using Google Maps; Litter concentration is average of final and initial litter; Wet deposition from Huntington Forest NY site from MDN; Throughfall concentration taken from Kalicin et al., 2008
Sunday Lake, NY, USA	North America	43.8611	-75.1019		2001-2003	Coniferous Forest	63.75	9.7			25.4	6.73167	7.34233	27.7577							Demers et al. 2007, https://doi.org/10.1890/06-1697.1	Demers et al. 2007, https://doi.org/10.1890/06-1697.1; Kalicin et al., 2008	Mercury Deposition Network			Wright et al. 2016, https://doi.org/10.5194/acp-16-13399-2016	Longitude corrected by 1 degree using Google Maps; Litter concentration is average of final and initial litter; Wet deposition from Huntington Forest NY site from MDN; Throughfall concentration taken from Kalicin et al., 2008
Sunday Lake, NY, USA	North America	43.8611	-75.1019		2000-2001	Deciduous Forest		15		3.3	5.7	7.3	9.4	11.3							Kalicin et al., 2008	Kalicin et al., 2008	Kalicin et al., 2008			Wright et al. 2016, https://doi.org/10.5194/acp-16-13399-2016	Longitude corrected by 1 degree using Google Maps;
Sunday Lake, NY, USA	North America	43.8611	-75.1019		2000-2001	Coniferous Forest		5.7			26.6	7.3	9.4	22.9							Kalicin et al., 2008	Kalicin et al., 2008	Kalicin et al., 2008			Wright et al. 2016, https://doi.org/10.5194/acp-16-13399-2016	Longitude corrected by 1 degree using Google Maps; Wright et al. 2016 incorrectly list net-throughfall
Marcell Experimental Forest, MN, USA	North America	47.5333	-93.4667		1995	Deciduous Forest	38.3	12.5	0.85	17.5	9.75	9.9	6.5	15.75							Grigal et al. 2000, https://doi.org/10.1023/A:1006322705566	Grigal et al. 2000, https://doi.org/10.1023/A:1006322705566; Kolka et al. 1999, https://doi.org/10.1023/A:1005020326683	Grigal et al. 2000, https://doi.org/10.1023/A:1006322705566			Wright et al. 2016, https://doi.org/10.5194/acp-16-13399-2016
Marcell Experimental Forest, MN, USA	North America	47.5333	-93.4667		1995	Coniferous Forest	29.7	11.7	1.36	33.6	19.6	9.9	6.5	24.8							Grigal et al. 2000, https://doi.org/10.1023/A:1006322705566	Grigal et al. 2000, https://doi.org/10.1023/A:1006322705566; Kolka et al. 1999, https://doi.org/10.1023/A:1005020326683	Grigal et al. 2000, https://doi.org/10.1023/A:1006322705566			Wright et al. 2016, https://doi.org/10.5194/acp-16-13399-2016
Marcell Experimental Forest, MN, USA (MN16)	North America	47.53	-93.47	431	2007-2009	Deciduous Forest		3.8	0.4				6.7		1.32667	1.05527		0.0095783			Risch et al. 2012, https://doi.org/10.1016/j.envpol.2011.06.005		Risch et al. 2012, https://doi.org/10.1016/j.envpol.2011.06.005	ELA value from St Louis et al. 2019, https://doi.org/10.1021/acs.est.9b01338		Wright et al. 2016, https://doi.org/10.5194/acp-16-13399-2016
Marcell Experimental Forest, MN, USA (MN16)	North America	47.53	-93.47	431	2012-2014	Deciduous Forest	27.4333	3.43333					7.3		1.38	1.05527		0.00831962			Risch et al. 2017, https://doi.org/10.1016/j.envpol.2017.05.004		Risch et al. 2017, https://doi.org/10.1016/j.envpol.2017.05.004	ELA value from St Louis et al. 2019, https://doi.org/10.1021/acs.est.9b01338
Noland Divide and Clingmans Dome, TN, USA	North America	35.52	-83.46	1862	2008-2009	Coniferous forest	57.6725	12.2425		17.395	3.76	6.03			1.278	1.1186		0.0339563			Fisher and Wolfe, 2012, https://doi.org/10.1016/j.atmosenv.2011.10.017	Fisher and Wolfe, 2012, https://doi.org/10.1016/j.atmosenv.2011.10.017	Fisher and Wolfe, 2012, https://doi.org/10.1016/j.atmosenv.2011.10.017	Yorkville Data from AMNET		Wright et al. 2016, https://doi.org/10.5194/acp-16-13399-2016	Coordinates extracted from Google Maps; Average of two high altitude coniferous sites; open precipitation concentration from MDN site TN-12 but no flux available
Noland Creek, TN, USA	North America	35.46	-83.53	592	2008-2009	Deciduous Forest	37.49	29.305		13.81	2.07	6.03			1.278	1.1186		0.0812815			Fisher and Wolfe, 2012, https://doi.org/10.1016/j.atmosenv.2011.10.017	Fisher and Wolfe, 2012, https://doi.org/10.1016/j.atmosenv.2011.10.017	Fisher and Wolfe, 2012, https://doi.org/10.1016/j.atmosenv.2011.10.017	Yorkville Data from AMNET		Wright et al. 2016, https://doi.org/10.5194/acp-16-13399-2016	Coordinates extracted from Google Maps; open precipitation concentration from MDN site TN-12 but no flux available
Experimental Lakes Area, Ontario, Canada	North America	49.72	-93.76		2001-2010	Coniferous Forest		10.8	1.9		12.6		3.3	20.2	1.3675	1.04243	0.048795	0.0260884			St Louis et al. 2019, https://doi.org/10.1021/acs.est.9b01338; Graydon et al. 2008, https://doi.org/10.1021/es801056j	St Louis et al. 2019, https://doi.org/10.1021/acs.est.9b01338; Graydon et al. 2008, https://doi.org/10.1021/es801056j	St Louis et al. 2019, https://doi.org/10.1021/acs.est.9b01338; Graydon et al. 2008, https://doi.org/10.1021/es801056j	St Louis et al. 2019, https://doi.org/10.1021/acs.est.9b01338; Graydon et al. 2008, https://doi.org/10.1021/es801056j			Coordinates extracted from Google Maps for Lake 658; old growth (jack pine, black spruce)
Experimental Lakes Area, Ontario, Canada	North America	49.72	-93.76		2001-2010	Mixed Forest/Wetland		10.3	3.2		8.7		3.3	15.9	1.3675	1.04243	0.038408	0.0248806			St Louis et al. 2019, https://doi.org/10.1021/acs.est.9b01338; Graydon et al. 2008, https://doi.org/10.1021/es801056j	St Louis et al. 2019, https://doi.org/10.1021/acs.est.9b01338; Graydon et al. 2008, https://doi.org/10.1021/es801056j	St Louis et al. 2019, https://doi.org/10.1021/acs.est.9b01338; Graydon et al. 2008, https://doi.org/10.1021/es801056j	St Louis et al. 2019, https://doi.org/10.1021/acs.est.9b01338; Graydon et al. 2008, https://doi.org/10.1021/es801056j			Coordinates extracted from Google Maps for Lake 658; wetland (black spruce, alder)
Experimental Lakes Area, Ontario, Canada	North America	49.72	-93.76		2001-2010	Deciduous Forest		7.8	1.6		4.9		3.3	8.9	1.3675	1.04243	0.0214988	0.0188416			St Louis et al. 2019, https://doi.org/10.1021/acs.est.9b01338; Graydon et al. 2008, https://doi.org/10.1021/es801056j	St Louis et al. 2019, https://doi.org/10.1021/acs.est.9b01338; Graydon et al. 2008, https://doi.org/10.1021/es801056j	St Louis et al. 2019, https://doi.org/10.1021/acs.est.9b01338; Graydon et al. 2008, https://doi.org/10.1021/es801056j	St Louis et al. 2019, https://doi.org/10.1021/acs.est.9b01338; Graydon et al. 2008, https://doi.org/10.1021/es801056j			Coordinates extracted from Google Maps for Lake 658; deciduous (red maple, birch)
Experimental Lakes Area, Ontario, Canada	North America	49.72	-93.76		2001-2010	Coniferous Forest		9.7	1.9		4.7		3.3	11.2	1.3675	1.04243	0.0270547	0.0234313			St Louis et al. 2019, https://doi.org/10.1021/acs.est.9b01338; Graydon et al. 2008, https://doi.org/10.1021/es801056j	St Louis et al. 2019, https://doi.org/10.1021/acs.est.9b01338; Graydon et al. 2008, https://doi.org/10.1021/es801056j	St Louis et al. 2019, https://doi.org/10.1021/acs.est.9b01338; Graydon et al. 2008, https://doi.org/10.1021/es801056j	St Louis et al. 2019, https://doi.org/10.1021/acs.est.9b01338; Graydon et al. 2008, https://doi.org/10.1021/es801056j			Coordinates extracted from Google Maps for Lake 658; re-growth (young jack pine)
Experimental Lakes Area, Ontario, Canada	North America	49.72	-93.76		1995-1999	Coniferous Forest	29	11.5		20	8	10	7.1	12.4							St. Louis et al. 2001, https://doi.org/10.1021/es001924p	St. Louis et al. 2001, https://doi.org/10.1021/es001924p	St. Louis et al. 2001, https://doi.org/10.1021/es001924p			Wright et al. 2016, https://doi.org/10.5194/acp-16-13399-2016
Cadillac Brook, ME, USA	North America	44.34	-68.22	295	2000-2003	Deciduous Forest	31.6	10			9.4		6.8	12.6							Sheehan et al. 2006, https://doi.org/10.1007/s11270-006-3034-y	Johnson 2002, http://digitalcommons.library.umaine.edu/etd/393; Johnson et al. 2007, https://doi.org/10.1007/s10661-006-9331-5; Nelson et al. 2007, https://doi.org/10.1007/s10661-006-9332-4	Johnson 2002, http://digitalcommons.library.umaine.edu/etd/393; Johnson et al. 2007, https://doi.org/10.1007/s10661-006-9331-5; Nelson et al. 2007, https://doi.org/10.1007/s10661-006-9332-4			Wright et al. 2016, https://doi.org/10.5194/acp-16-13399-2016	Overlaps in throughfall and wet deposition with Johnson 2000, but measured more litterfall samples. Litterfall comes from 2002-2003; Concentration comes from hardwoods
Hadlock Brook, ME, USA	North America	44.33	-68.29	258.5	2000-2003	Coniferous Forest	58.8	10.1			10.2		6.8	13.5							Sheehan et al. 2006, https://doi.org/10.1007/s11270-006-3034-y	Johnson 2002, http://digitalcommons.library.umaine.edu/etd/393; Johnson et al. 2007, https://doi.org/10.1007/s10661-006-9331-5; Nelson et al. 2007, https://doi.org/10.1007/s10661-006-9332-4	Johnson 2002, http://digitalcommons.library.umaine.edu/etd/393; Johnson et al. 2007, https://doi.org/10.1007/s10661-006-9331-5; Nelson et al. 2007, https://doi.org/10.1007/s10661-006-9332-4			Wright et al. 2016, https://doi.org/10.5194/acp-16-13399-2016	Overlaps in throughfall and wet deposition with Johnson 2000, but measured more litterfall samples. Litterfall comes from 2002-2003; Concentration comes from softwoods
Vermont, USA	North America	44.2	-72.7		2008-2009	Mixed Forest	50	17.9							1.407	1.06163		0.0427995			Juillerat et al. 2012, https://doi.org/10.1002/etc.1896			Underhill data from AMNET		Wright et al. 2016, https://doi.org/10.5194/acp-16-13399-2016	Coordinates are selected from midpoints of the 15 available sites in Vermont; Average taken over 15 sites
Walker Branch, TN, USA	North America	35.9667	-84.2833	315	1991-1995	Deciduous Forest	105	30		10.99	14	7.79	10	34							Lindberg 1996, https://doi.org/10.1007/978-94-009-1780-4_18	Lindberg 1996, https://doi.org/10.1007/978-94-009-1780-4_18	Lindberg 1996, https://doi.org/10.1007/978-94-009-1780-4_18			Wright et al. 2016, https://doi.org/10.5194/acp-16-13399-2016
Thompson Research Center, Cedar River, WA, USA	North America	47.36	-121.61	220	2008	Deciduous Forest	35	9													Obrist et al. 2012, https://doi.org/10.1002/jpln.201000415					Wright et al. 2016, https://doi.org/10.5194/acp-16-13399-2016	Coordinates extracted from Google Maps; alder
Thompson Research Center, Cedar River, WA, USA	North America	47.36	-121.61	220	2008	Coniferous Forest	70	8.4													Obrist et al. 2012, https://doi.org/10.1002/jpln.201000415					Wright et al. 2016, https://doi.org/10.5194/acp-16-13399-2016	Coordinates extracted from Google Maps; fir
Underhill, VT, USA	North America	44.53	-72.87	400	1994-1995	Deciduous Forest	50.15	14.4		12	11.7	6.5	7.9	18.2							Rea et al. 1996, https://doi.org/10.1016/1352-2310(96)00087-8; Rea et al. 2002, https://doi.org/10.1023/A:1012919731598	Rea et al. 1996, https://doi.org/10.1016/1352-2310(96)00087-8	Rea et al. 1996, https://doi.org/10.1016/1352-2310(96)00087-8			Wright et al. 2016, https://doi.org/10.5194/acp-16-13399-2016	Litterfall is average of 1994 and 1995
Underhill, VT, USA (VT99)	North America	44.53	-72.87	399	2007-2009	Deciduous Forest		11.3	1.8				7.8		1.407	1.06163		0.0270187			Risch et al. 2012, https://doi.org/10.1016/j.envpol.2011.06.005		Risch et al. 2012, https://doi.org/10.1016/j.envpol.2011.06.005	Underhill data from AMNET		Wright et al. 2016, https://doi.org/10.5194/acp-16-13399-2016
Pellston, MI, USA	North America	45.57	-84.8		1996	Deciduous Forest	32.5	11.4	2.8		10.5		8.7	13.2							Rea et al. 2002, https://doi.org/10.1023/A:1012919731598;	Rea et al. 2001, https://doi.org/10.1016/S1352-2310(01)00133-9	Rea et al. 2001, https://doi.org/10.1016/S1352-2310(01)00133-9			Wright et al. 2016, https://doi.org/10.5194/acp-16-13399-2016
New Hampshire and Vermont, USA	North America	44.2	-72.3	633.25	2012-2014	Coniferous Forest		3	1						1.244	1.06163		0.00811298			Richardson and Friedland 2015, https://doi.org/10.5194/bg-12-6737-2015			Underhill data from AMNET		Wright et al. 2016, https://doi.org/10.5194/acp-16-13399-2016	Coordinates are selected from midpoints of the 8 available sites in Vermont and New Hampshire; Average taken over 8 sites
New Hampshire and Vermont, USA	North America	44.2	-72.3	633.25	2012-2014	Deciduous Forest		24	5						1.244	1.06163		0.0649038			Richardson and Friedland 2015, https://doi.org/10.5194/bg-12-6737-2015			Underhill data from AMNET		Wright et al. 2016, https://doi.org/10.5194/acp-16-13399-2016	Coordinates are selected from midpoints of the 8 available sites in Vermont and New Hampshire; Average taken over 8 sites
Okefenokee, GA, USA (GA09)	North America	30.74	-82.13	47	2007-2009	Mixed Forest		5.4	0.1				12.9		1.3195	1.07139		0.0138943			Risch et al. 2012, https://doi.org/10.1016/j.envpol.2011.06.005		Risch et al. 2012, https://doi.org/10.1016/j.envpol.2011.06.005	Average of Yorkville (GA40) and Pensacola (FL96) from AMNET		Wright et al. 2016, https://doi.org/10.5194/acp-16-13399-2016
Okefenokee, GA, USA (GA09)	North America	30.74	-82.13	47	2012-2014	Mixed Forest	29.6	3.9					13.5		1.4055	1.07139		0.00942075			Risch et al. 2017, https://doi.org/10.1016/j.envpol.2017.05.004		Risch et al. 2017, https://doi.org/10.1016/j.envpol.2017.05.004	Average of Yorkville (GA40) and Pensacola (FL96) from AMNET
Roush Lake, IN, USA (IN20)	North America	40.84	-85.46	244	2007-2009	Deciduous Forest		13.9	5.2				8.3								Risch et al. 2012, https://doi.org/10.1016/j.envpol.2011.06.005		Risch et al. 2012, https://doi.org/10.1016/j.envpol.2011.06.005			Wright et al. 2016, https://doi.org/10.5194/acp-16-13399-2016
Clifty Falls, IN, USA (IN21)	North America	38.76	-85.42	256	2007-2009	Deciduous Forest		16	1.2				15								Risch et al. 2012, https://doi.org/10.1016/j.envpol.2011.06.005		Risch et al. 2012, https://doi.org/10.1016/j.envpol.2011.06.005			Wright et al. 2016, https://doi.org/10.5194/acp-16-13399-2016
Clifty Falls, IN, USA (IN21)	North America	38.76	-85.42	256	2015-2016	Deciduous Forest	49.95	14.1					11.2		1.378	1.06925		0.0346702			Risch et al. 2018, https://doi.org/10.3390/atmos9010029		Risch et al. 2018, https://doi.org/10.3390/atmos9010029	Clifty Falls data from AMNET
Fort Harrison, IN, USA (IN26)	North America	39.86	-86.02	260	2007-2009	Deciduous Forest		17.4	5.5				13							urban	Risch et al. 2012, https://doi.org/10.1016/j.envpol.2011.06.005		Risch et al. 2012, https://doi.org/10.1016/j.envpol.2011.06.005			Wright et al. 2016, https://doi.org/10.5194/acp-16-13399-2016	Urban site close to Indianapolis
Indiana Dunes, IN, USA (IN34)	North America	41.63	-87.09	208	2007-2009	Deciduous Forest		18.7	5.7				10.9								Risch et al. 2012, https://doi.org/10.1016/j.envpol.2011.06.005		Risch et al. 2012, https://doi.org/10.1016/j.envpol.2011.06.005			Wright et al. 2016, https://doi.org/10.5194/acp-16-13399-2016
Indiana Dunes, IN, USA (IN34)	North America	41.63	-87.09	208	2012-2014	Deciduous Forest	38.8333	16.7667					11.5333								Risch et al. 2017, https://doi.org/10.1016/j.envpol.2017.05.004		Risch et al. 2017, https://doi.org/10.1016/j.envpol.2017.05.004
Indiana Dunes, IN, USA (IN34)	North America	41.63	-87.09	208	2015-2016	Deciduous Forest	39.05	15.6					7.95								Risch et al. 2018, https://doi.org/10.3390/atmos9010029		Risch et al. 2018, https://doi.org/10.3390/atmos9010029
Mammoth Cave, KY, USA (KY10)	North America	37.13	-86.15	236	2007-2009	Deciduous Forest		12.6	0.1				10.8								Risch et al. 2012, https://doi.org/10.1016/j.envpol.2011.06.005		Risch et al. 2012, https://doi.org/10.1016/j.envpol.2011.06.005			Wright et al. 2016, https://doi.org/10.5194/acp-16-13399-2016
Piney Reservoir, MD, USA (MD08)	North America	39.71	-79.01	769	2007-2009	Deciduous Forest		15.3	2.1				8.3		1.285	1.084		0.0409			Risch et al. 2012, https://doi.org/10.1016/j.envpol.2011.06.005		Risch et al. 2012, https://doi.org/10.1016/j.envpol.2011.06.005	Piney Dam data from AMNET		Wright et al. 2016, https://doi.org/10.5194/acp-16-13399-2016
Beltsville, MD, USA (MD99)	North America	39.03	-76.82	46	2007-2009	Deciduous Forest		15.5	1				10.3		1.3135	1.0651		0.0398288		urban	Risch et al. 2012, https://doi.org/10.1016/j.envpol.2011.06.005		Risch et al. 2012, https://doi.org/10.1016/j.envpol.2011.06.005	Average of two Beltsville AMNET sites		Wright et al. 2016, https://doi.org/10.5194/acp-16-13399-2016	Urban site close to DC
Beltsville, MD, USA (MD99)	North America	39.03	-76.82	46	2012-2014	Mixed Forest	38.7	14.0333					7.43333		1.3935	1.0651		0.0339899		urban	Risch et al. 2017, https://doi.org/10.1016/j.envpol.2017.05.004		Risch et al. 2017, https://doi.org/10.1016/j.envpol.2017.05.004	Average of two Beltsville AMNET sites
Seney, MI, USA (MI48)	North America	46.29	-85.95	216	2007-2009	Coniferous Forest		7.4	0.4				5.7		1.529	1.03761		0.0159135			Risch et al. 2012, https://doi.org/10.1016/j.envpol.2011.06.005		Risch et al. 2012, https://doi.org/10.1016/j.envpol.2011.06.005	Burnt Island, Canada data from CAPMON		Wright et al. 2016, https://doi.org/10.5194/acp-16-13399-2016
Seney, MI, USA (MI48)	North America	46.29	-85.95	216	2012-2014	Mixed Forest	42.4667	5.5					7.43333								Risch et al. 2017, https://doi.org/10.1016/j.envpol.2017.05.004		Risch et al. 2017, https://doi.org/10.1016/j.envpol.2017.05.004
Blaine, MN, USA (MN98)	North America	45.14	-93.22	275	2007-2009	Deciduous Forest		7.8	0.3				6.5								Risch et al. 2012, https://doi.org/10.1016/j.envpol.2011.06.005		Risch et al. 2012, https://doi.org/10.1016/j.envpol.2011.06.005			Wright et al. 2016, https://doi.org/10.5194/acp-16-13399-2016
Biscuit Brook, NY, USA (NY68)	North America	41.99	-74.5	634	2007-2009	Deciduous Forest		15.3	1				9.6		1.47333	1.07042		0.0352249			Risch et al. 2012, https://doi.org/10.1016/j.envpol.2011.06.005		Risch et al. 2012, https://doi.org/10.1016/j.envpol.2011.06.005	Average of 2 Rochester sites and Bronx AMNET sites		Wright et al. 2016, https://doi.org/10.5194/acp-16-13399-2016
Biscuit Brook, NY, USA (NY68)	North America	41.99	-74.5	634	2012-2014	Deciduous Forest	60.35	9.1					8.5		1.665	1.07042		0.018539			Risch et al. 2017, https://doi.org/10.1016/j.envpol.2017.05.004		Risch et al. 2017, https://doi.org/10.1016/j.envpol.2017.05.004	Average of 2 Rochester sites and Bronx AMNET sites
Athens, OH, USA (OH02)	North America	39.31	-82.12	275	2007-2009	Deciduous Forest		18.8	2.8				8.4		1.332	1.06821		0.0477765			Risch et al. 2012, https://doi.org/10.1016/j.envpol.2011.06.005		Risch et al. 2012, https://doi.org/10.1016/j.envpol.2011.06.005	Athens AMNET sites		Wright et al. 2016, https://doi.org/10.5194/acp-16-13399-2016
Alleghany Portage, PA, USA (PA13)	North America	40.46	-78.56	739	2007-2009	Deciduous Forest		13.6	4				8.4		1.285	1.0651		0.0357217			Risch et al. 2012, https://doi.org/10.1016/j.envpol.2011.06.005		Risch et al. 2012, https://doi.org/10.1016/j.envpol.2011.06.005	Piney Dam data from AMNET (PA13 not complete for these years)		Wright et al. 2016, https://doi.org/10.5194/acp-16-13399-2016
Alleghany Portage, PA, USA (PA13)	North America	40.46	-78.56	739	2012-2014	Deciduous Forest	46.7333	13.2667					9.96667		1.345	1.0651		0.0332917			Risch et al. 2017, https://doi.org/10.1016/j.envpol.2017.05.004		Risch et al. 2017, https://doi.org/10.1016/j.envpol.2017.05.004	Piney Dam data from AMNET
Cape Romaine, SC, USA (SC05)	North America	32.94	-79.66	3	2007-2009	Mixed Forest		9.3	0.2				8.2								Risch et al. 2012, https://doi.org/10.1016/j.envpol.2011.06.005		Risch et al. 2012, https://doi.org/10.1016/j.envpol.2011.06.005			Wright et al. 2016, https://doi.org/10.5194/acp-16-13399-2016
Cape Romaine, SC, USA (SC05)	North America	32.94	-79.66	3	2012-2014	Deciduous Forest	39.6667	9.83333					9.86667								Risch et al. 2017, https://doi.org/10.1016/j.envpol.2017.05.004		Risch et al. 2017, https://doi.org/10.1016/j.envpol.2017.05.004
Smoky Mountains, TN, USA (TN11)	North America	35.66	-83.59	640	2007-2009	Deciduous Forest		14.9	4.7				10.9		1.278	1.1186		0.0413273			Risch et al. 2012, https://doi.org/10.1016/j.envpol.2011.06.005		Risch et al. 2012, https://doi.org/10.1016/j.envpol.2011.06.005	Yorkville Data from AMNET		Wright et al. 2016, https://doi.org/10.5194/acp-16-13399-2016
Shenandoah, VA, USA (VA28)	North America	38.52	-78.44	1074	2007-2009	Mixed Forest		7.8	0.8				9.6		1.285	1.05505		0.0202941			Risch et al. 2012, https://doi.org/10.1016/j.envpol.2011.06.005		Risch et al. 2012, https://doi.org/10.1016/j.envpol.2011.06.005	Piney Dam data from AMNET		Wright et al. 2016, https://doi.org/10.5194/acp-16-13399-2016
Popple River, WI, USA (WI09)	North America	45.8	-88.4	421	2007-2009	Mixed Forest		10	1.1				7.1		1.339	1.04412		0.0247101			Risch et al. 2012, https://doi.org/10.1016/j.envpol.2011.06.005		Risch et al. 2012, https://doi.org/10.1016/j.envpol.2011.06.005	Horicon Marsh Data from AMNET (2011)		Wright et al. 2016, https://doi.org/10.5194/acp-16-13399-2016
Devil's Lake, WI, USA (WI31)	North America	43.44	-89.68	389	2007-2009	Deciduous Forest		4.6	1				9.5		1.339	1.05372		0.0114712			Risch et al. 2012, https://doi.org/10.1016/j.envpol.2011.06.005		Risch et al. 2012, https://doi.org/10.1016/j.envpol.2011.06.005	Horicon Marsh Data from AMNET (2011)		Wright et al. 2016, https://doi.org/10.5194/acp-16-13399-2016
Trout Lake, WI, USA (WI36)	North America	46.05	-89.65	501	2007-2009	Coniferous Forest		7.6	1.4				5.7		1.339	1.05795		0.0190284			Risch et al. 2012, https://doi.org/10.1016/j.envpol.2011.06.005		Risch et al. 2012, https://doi.org/10.1016/j.envpol.2011.06.005	Horicon Marsh Data from AMNET (2011)		Wright et al. 2016, https://doi.org/10.5194/acp-16-13399-2016
Lake Geneva, WI, USA (WI99)	North America	42.58	-88.5	288	2007-2009	Deciduous Forest		14.3	1.3				10.3		1.339	1.05036		0.0355466			Risch et al. 2012, https://doi.org/10.1016/j.envpol.2011.06.005		Risch et al. 2012, https://doi.org/10.1016/j.envpol.2011.06.005	Horicon Marsh Data from AMNET (2011)		Wright et al. 2016, https://doi.org/10.5194/acp-16-13399-2016
Canaan Valley, WV, USA (WV99)	North America	39.06	-79.42	988	2007-2009	Mixed Forest		9.9	0.3				9.7		1.285	1.084		0.0264647			Risch et al. 2012, https://doi.org/10.1016/j.envpol.2011.06.005		Risch et al. 2012, https://doi.org/10.1016/j.envpol.2011.06.005	Piney Dam data from AMNET (WV99 not complete for these years)		Wright et al. 2016, https://doi.org/10.5194/acp-16-13399-2016
Canaan Valley, WV, USA (WV99)	North America	39.06	-79.42	988	2012-2014	Deciduous Forest	38.8	8.2					10.6		1.345	1.084		0.0209424			Risch et al. 2017, https://doi.org/10.1016/j.envpol.2017.05.004		Risch et al. 2017, https://doi.org/10.1016/j.envpol.2017.05.004	Piney Dam data from AMNET (WV99 not complete for these years)
Presque Isle, PA, USA (PA30)	North America	42.16	-80.11	177	2012-2014	Deciduous Forest	45.7333	14.6					10.3		1.6145	1.06558		0.0305356			Risch et al. 2017, https://doi.org/10.1016/j.envpol.2017.05.004		Risch et al. 2017, https://doi.org/10.1016/j.envpol.2017.05.004	Average of South Bass Island, Rochester from AMNET
Leading Ridge, PA, USA (PA42)	North America	40.66	-77.94	287	2012-2014	Mixed Forest	28.85	7.55					8.25		1.365	1.0651		0.0186685			Risch et al. 2017, https://doi.org/10.1016/j.envpol.2017.05.004		Risch et al. 2017, https://doi.org/10.1016/j.envpol.2017.05.004	Piney Dam data from AMNET
Bad River, WI, USA (WI95)	North America	46.6	-90.67	625	2012-2014	Deciduous Forest	29.5	7.76667					8.86667		1.491	1.05795		0.0174633			Risch et al. 2017, https://doi.org/10.1016/j.envpol.2017.05.004		Risch et al. 2017, https://doi.org/10.1016/j.envpol.2017.05.004	Horicon Marsh Data from AMNET
Mingo, MO, USA (MO46)	North America	36.97	-90.14	105	2012-2014	Deciduous Forest	39.8	13.2667					13.1333		1.202	1.05929		0.0370491			Risch et al. 2017, https://doi.org/10.1016/j.envpol.2017.05.004		Risch et al. 2017, https://doi.org/10.1016/j.envpol.2017.05.004	Stilwell data from AMNET
SW Agr. Center, IN, USA (IN22)	North America	38.74	-87.49	134	2015-2016	Deciduous Forest	46.25	17.3					9.8		1.2975	1.0572		0.0446686			Risch et al. 2018, https://doi.org/10.3390/atmos9010029		Risch et al. 2018, https://doi.org/10.3390/atmos9010029	Average of Clifty Falls and Bondville (up to 2017) from AMNET
Hubbard Brook, NH, USA	North America	43.9456	-71.7011	259	2017	Deciduous Forest		11		4.1	4.7	2.6	3.9	11.8	1.32	1.06163	0.0300737	0.0280348			Yang et al. 2019, https://doi.org/10.1007/s10533-019-00605-1	Yang et al. 2019, https://doi.org/10.1007/s10533-019-00605-1	Yang et al. 2019, https://doi.org/10.1007/s10533-019-00605-1	Underhill (UDH) from 2013-2015 GEOS-Chem Benchmark data			Control plot for soil warming / drought experiments; estimate open wet deposition by multiplying given concentration by mean precip (1500 mm/yr); data extracted from Figure 5
Hubbard Brook, NH, USA	North America	43.9369	-71.7732	510	2017	Deciduous Forest		12		5.1	4.7	2.6	3.9	12.8	1.32	1.06163	0.0326224	0.0305835			Yang et al. 2019, https://doi.org/10.1007/s10533-019-00605-1	Yang et al. 2019, https://doi.org/10.1007/s10533-019-00605-1	Yang et al. 2019, https://doi.org/10.1007/s10533-019-00605-1	Underhill (UDH) from 2013-2015 GEOS-Chem Benchmark data			Control plot for ice storm experiment; estimate open wet deposition by multiplying given concentration by mean precip (1500 mm/yr); data extracted from Figure 5
Everglades National Park, USA	North America	25.39	-80.68		1995-1996	Broadleaf Forest	1-40				26		23.5								Guentzel et al. 1998, https://doi.org/10.1016/S0048-9697(98)00071-0	Guentzel et al. 1998, https://doi.org/10.1016/S0048-9697(98)00071-0	Guentzel et al. 1998, https://doi.org/10.1016/S0048-9697(98)00071-0				Litterfall flux listed as range of 1-40 µg m^-2, however this is based on pers. communication, not on measurements of flux
Norton, MA, USA	North America	41.9636	-71.1833		2010	Mixed Forest	33	10					5		1.34	1.03522		0.0244811			Benoit et al. 2013, https://doi.org/10.1007/s13157-013-0447-4		Benoit et al. 2013, https://doi.org/10.1007/s13157-013-0447-4				Samples collected from October 6 – December 2
Coventry, CT, USA	North America	41.7917	-72.3747	162	2004-2005	Deciduous Forest	32.8	12.4					6.8	5.6						Micrometeorology	Bash and Miller 2009, https://doi.org/10.1016/j.atmosenv.2009.08.008		Bash and Miller 2009, https://doi.org/10.1016/j.atmosenv.2009.08.008		Bash and Miller 2009, https://doi.org/10.1016/j.atmosenv.2009.08.008		Total dry deposition measured with relaxed eddy accumulation (flux tower measurements) - missed early leaf out period, and smaller than litterfall flux; calculated litter concentration from given dry mass flux and litterfall Hg flux
Harvard Forest, MA, USA	North America	42.5333	-72.1833	340	2019-2020	Mixed Forest	20.4	8.1						25.1	1.1	1.04968		0.0244936	0.0723079	Micrometeorology	Obrist et al. 2021, https://doi.org/10.1073/pnas.2105477118			Obrist et al. 2021, https://doi.org/10.1073/pnas.2105477118; data repository:	Obrist et al. 2021, https://doi.org/10.1073/pnas.2105477118		Eddy Covariance flux tower measurements - net deposition is listed
